# Supplementary material for: Exploration of the close chemical space of tryptophan and tyrosinereveals importance of hydrophobicity in photo-CIDNP performances
Source: Copernicus journal article supplement (doi:10.5194/mr-2021-1), 2021-01-20
Supplement: Supplementary file [file mr-2021-1-RC1-supplement.pdf]

## Exploration of the close chemical space of tryptophan and tyrosine reveals importance of hydrophobicity in photo-CIDNP performances

Torres, Renn, Riek

I see no reason why this manuscript should not be published in its present form. The authors might like to make the following minor corrections.

Line 7: conventionally, CIDNP is Chemically Induced ... not Chemical Induced ...

Line 13: replace extend by extent

Line 31: Kaptein et al. (1978) describes the use of photo-CIDNP to study protein structure, not protein folding. Articles on protein folding include:

*J. Amer. Chem. Soc.* **119** (1997) 5049-5050

*J. Amer. Chem. Soc.* **125** (2003) 12484-12492

*Methods* **34** (2004) 75-87

A few abbreviations are used without explanation: HOPI, CW, ET

TCBP is first used as an abbreviation in line 48 but is not defined until line 125.

FLUO is defined as an abbreviation in line 125 but is never used.

Lines 54 and 69: constant wave should be continuous wave

Line 72: replace expends by extends

The text refers to parts A, B and F of Figure 1. The Figure itself has no such labels.

Line 98: replace spin-orbital by spin-orbit

Table 1: the quantity  $\text{Log}(P)$  should be defined in the caption.

Figure 1: the (coloured) polarized spectra would be easier to see without the dark spectra which are so weak as to be almost completely flat.

Line 188: replace favorized by favoured or favoured
